# Supplementary material for: Temperature-dependent autoactivation associated with clinical variability of PDGFRB Asn666 substitutions
Source: PubMed Central journal article supplement — Hum Mol Genet. 2021 Jan 15;30(1):72–7. doi: 10.1093/hmg/ddab014 (PMC8033145; doi:10.1093/hmg/ddab014), 2021-01-15
Supplement: supplemental_tables_and_figures_revision_ddab014.pdf [file supplemental_tables_and_figures_revision_ddab014.pdf]

# Supplemental data

- Supplemental Figure S1
- Supplemental Figure S2A
- Supplemental Figure S2B
- Supplemental Figure S3
- Supplemental Table S1
- Supplemental Table S1
- Supplemental Material and Methods

# Supplemental Figure S1

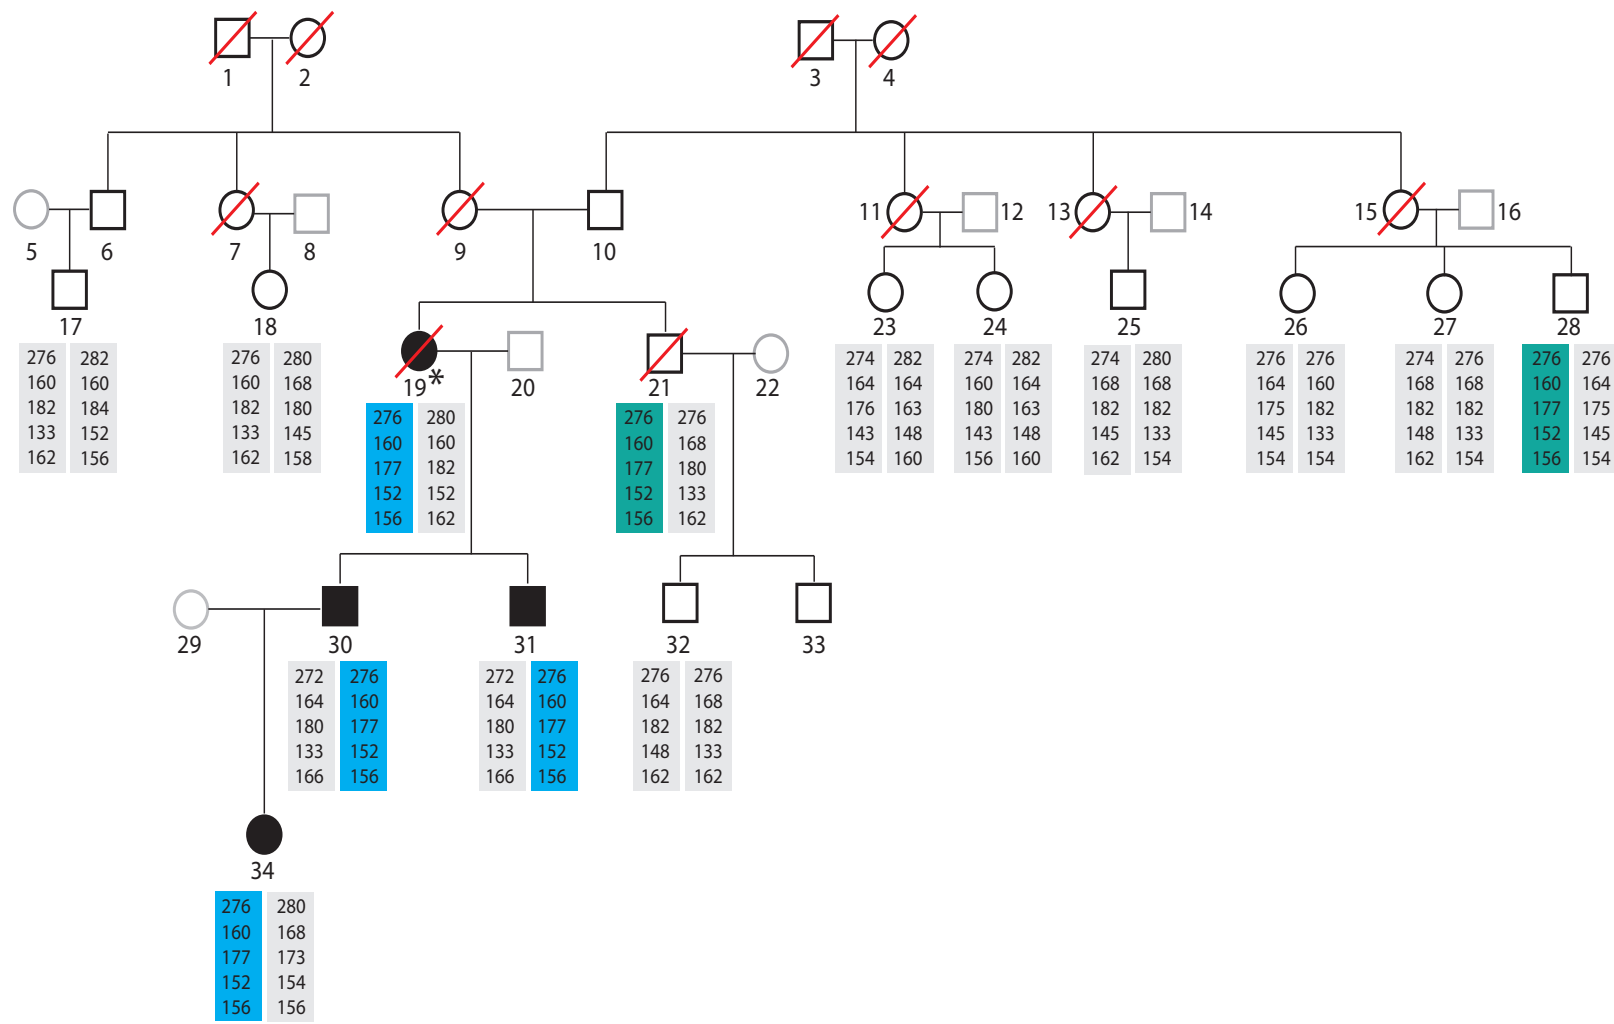

Figure of the pedigree of the original OPDKD family showing the results from haplotype analysis. While two healthy family members share the affected haplotype (marked in green) the *PDGFRB* mutation has occurred in the index patient (19\*) proving that it is a *de novo* mutation (haplotype marked in blue).

# Supplemental Figure S2

Skin temperature in cold (15°C)

and room temperature (27°C)

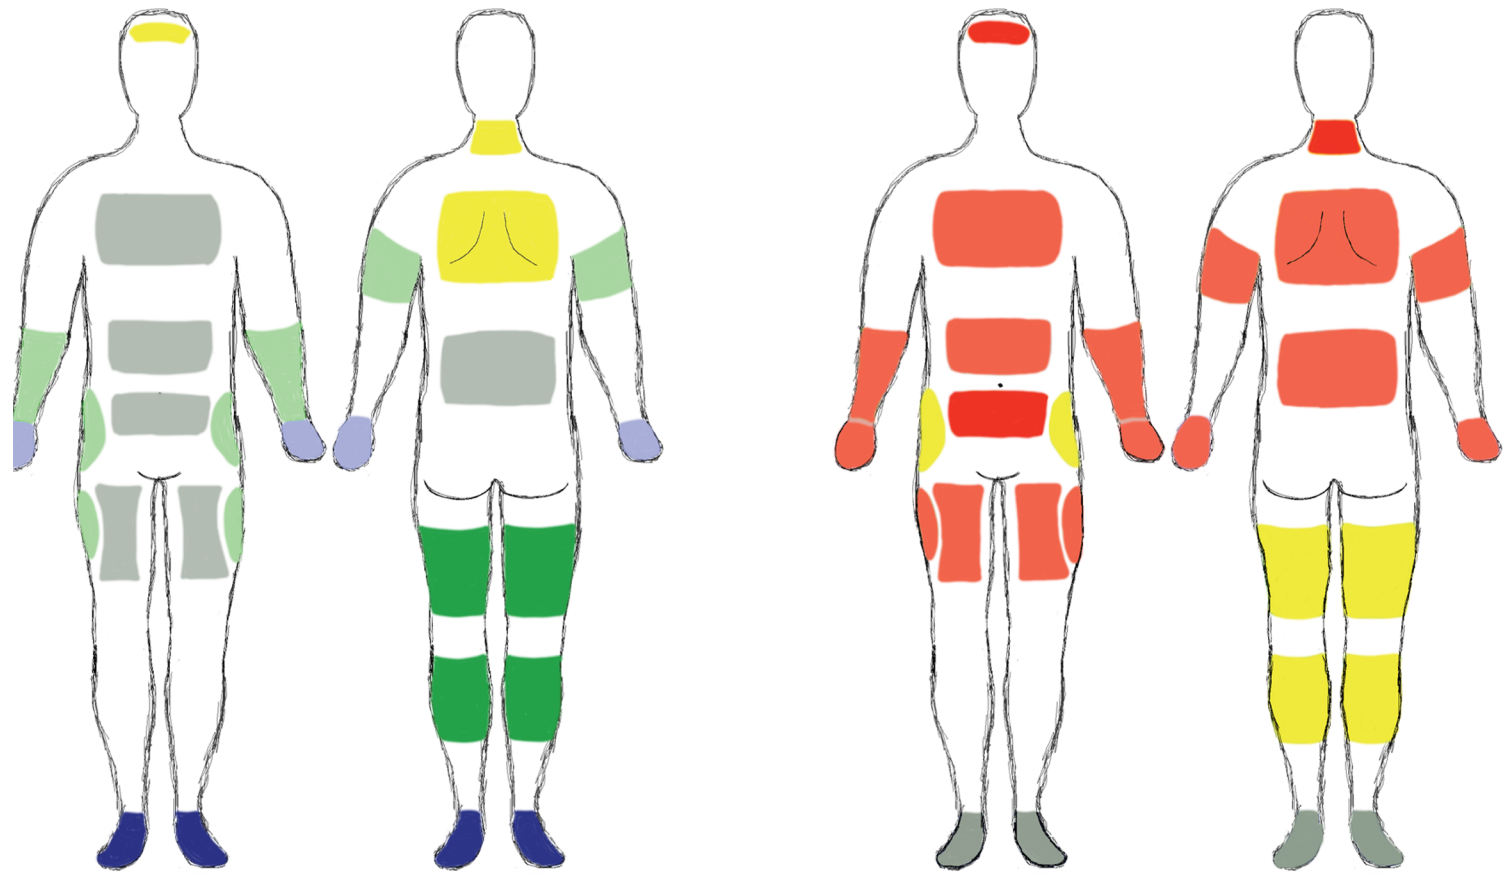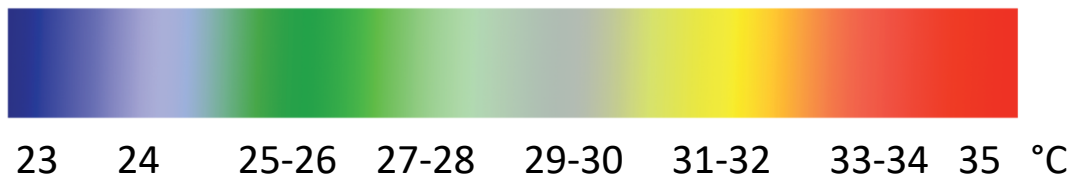

Schematic figure of skin temperature in various temperatures. Based on Webb P. Temperatures of skin, subcutaneous tissue, muscle and core in resting men in cold, comfortable and hot conditions. *Eur J Appl Physiol Occup Physiol*. 1992;64(5):471-6.

Supplemental Figure S3

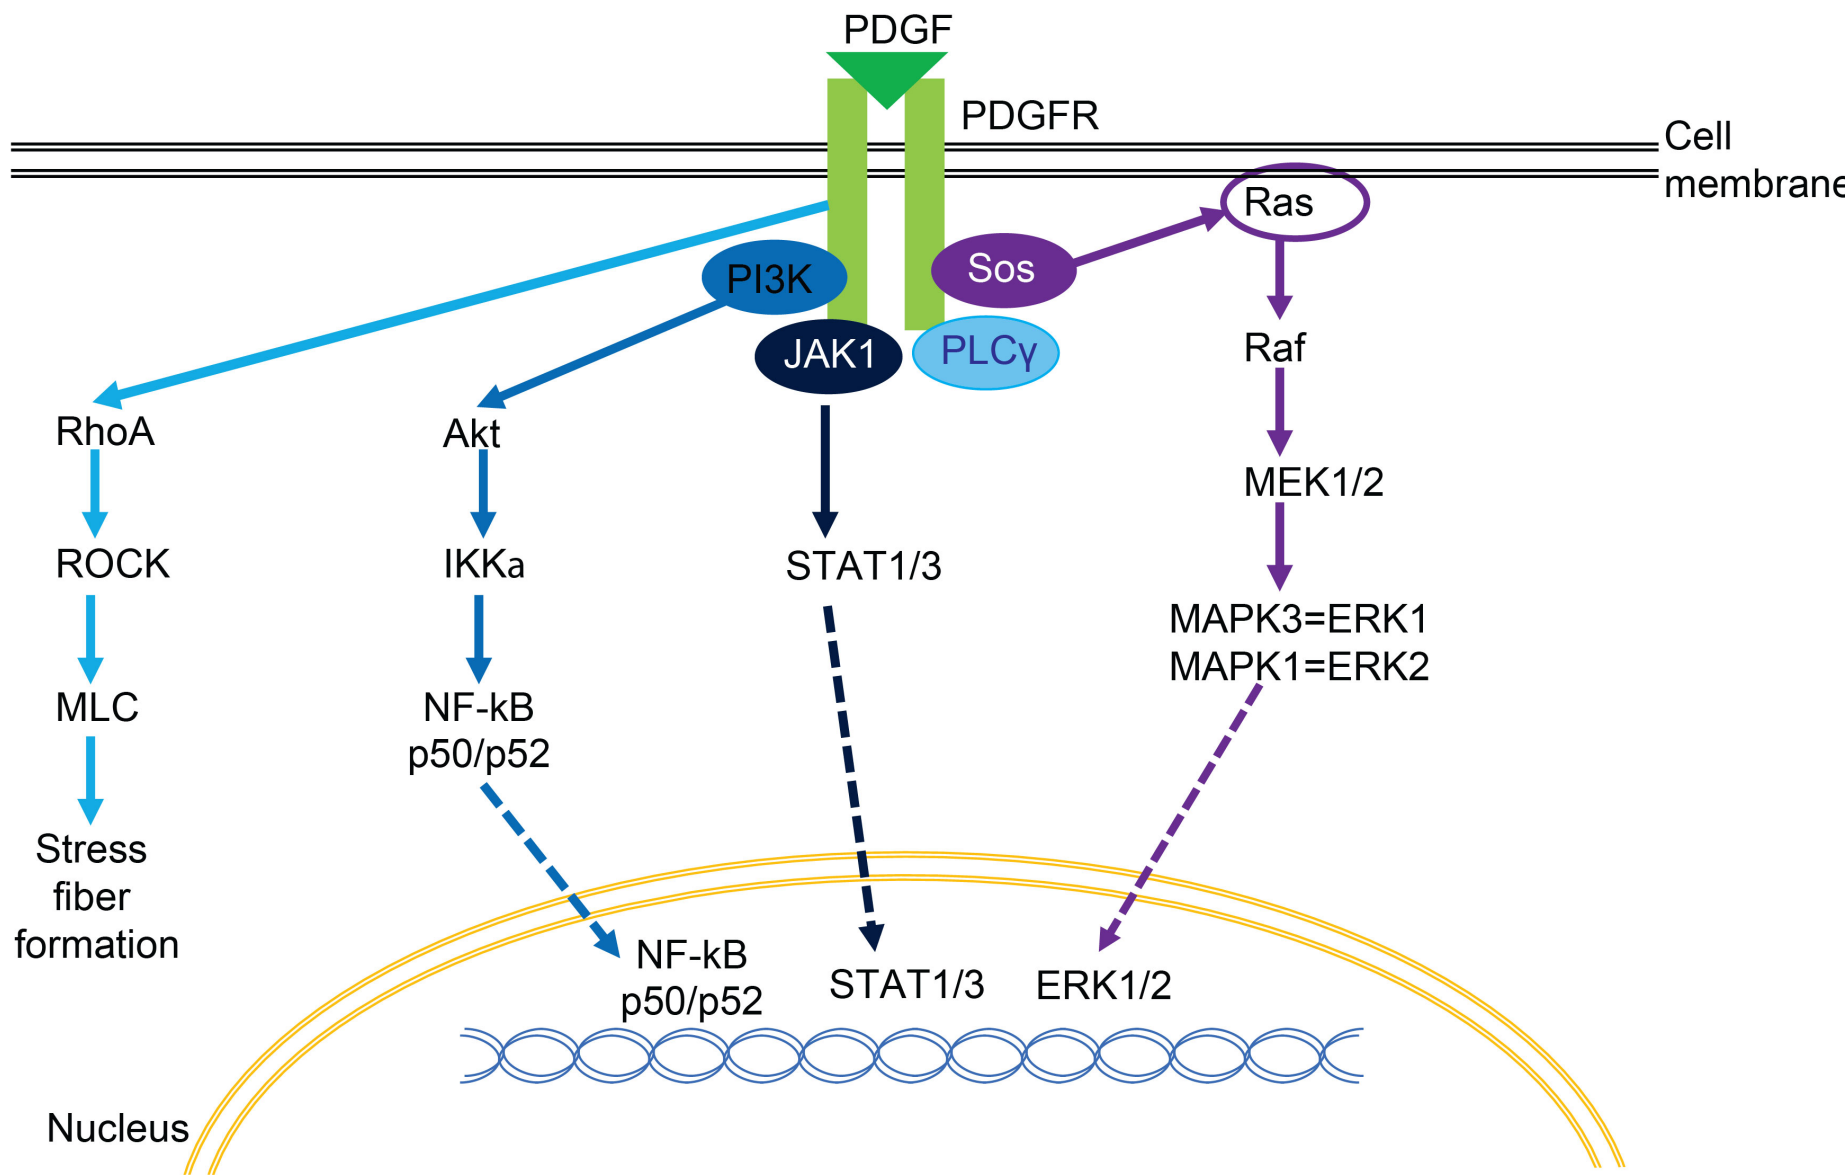

Overview PDGFR signaling. Adapted from Ying HZ, Chen Q, Zhang WY, Zhang HH, Ma Y, Zhang SZ, Fang J, Yu CH. PDGF signaling pathway in hepatic fibrosis pathogenesis and therapeutics. *Mol Med Rep.* 2017; 16(6):7879-89.

Supplemental Figure S4A

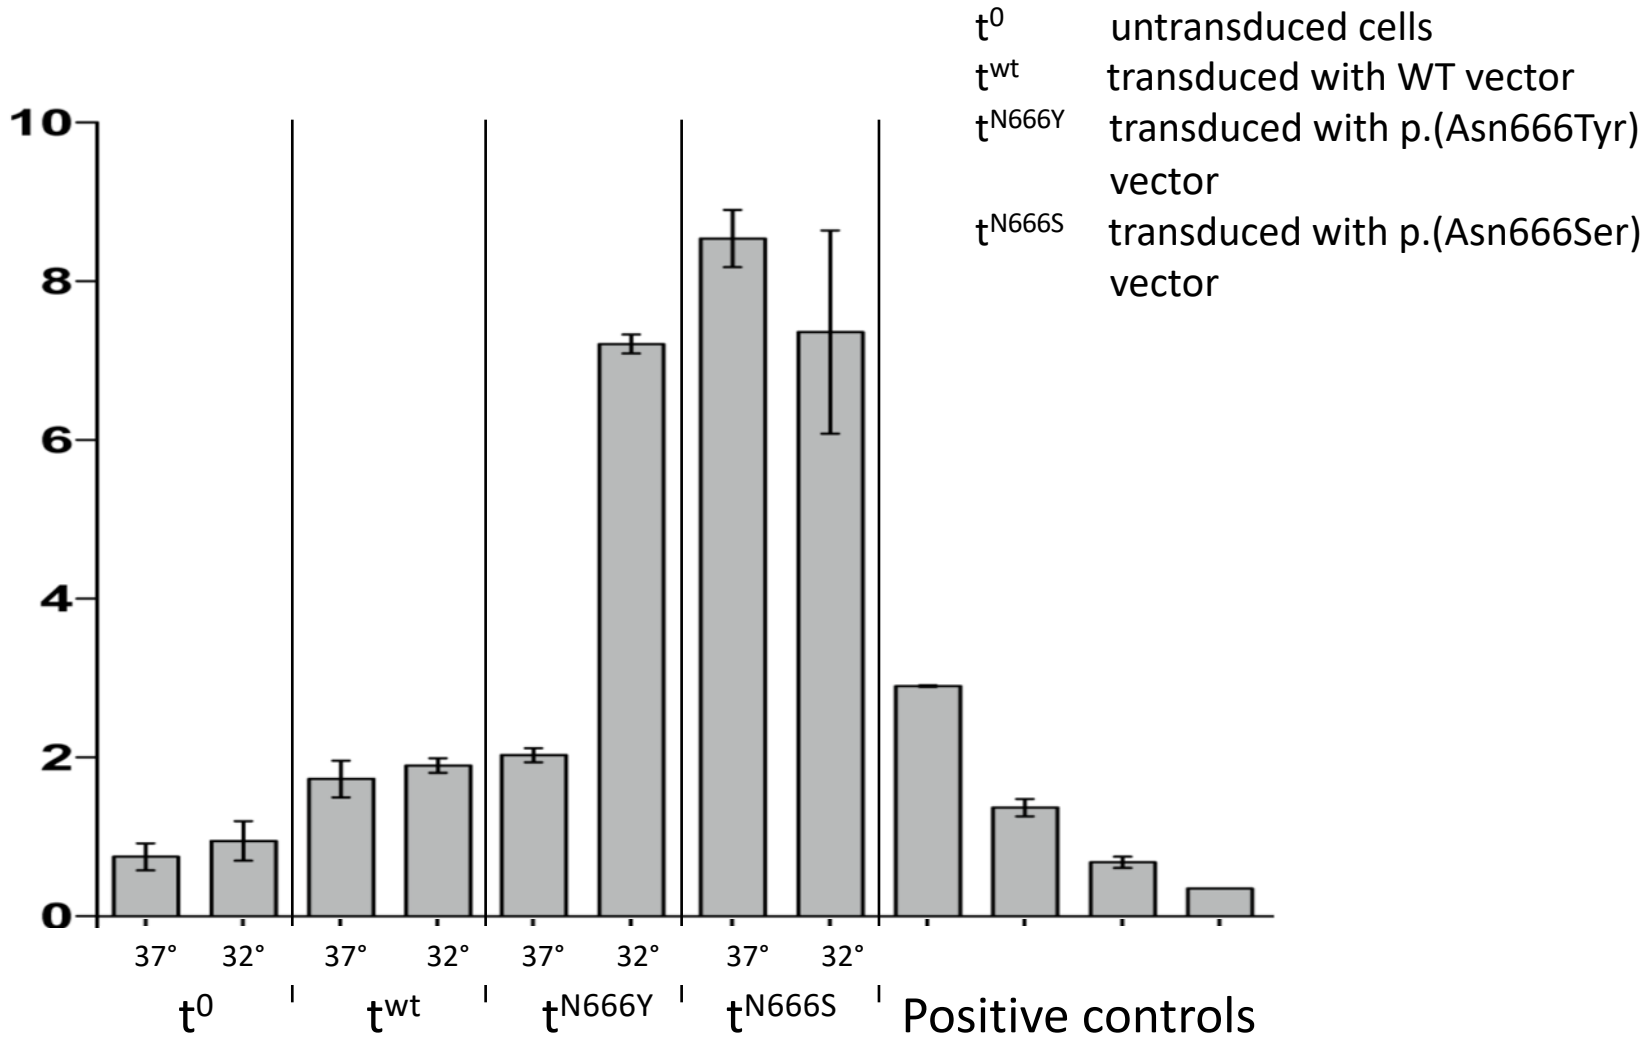

ELISA examination of total P-PDGFR $\beta$  in transduced Hela cells harvested after overnight serum starvation at 37° or 32° show greatly increased levels in p.(Asn666Tyr) transduced cells at 32° and in p.(Asn666Ser) transduced cells at both temperatures.

Supplemental Figure S4B

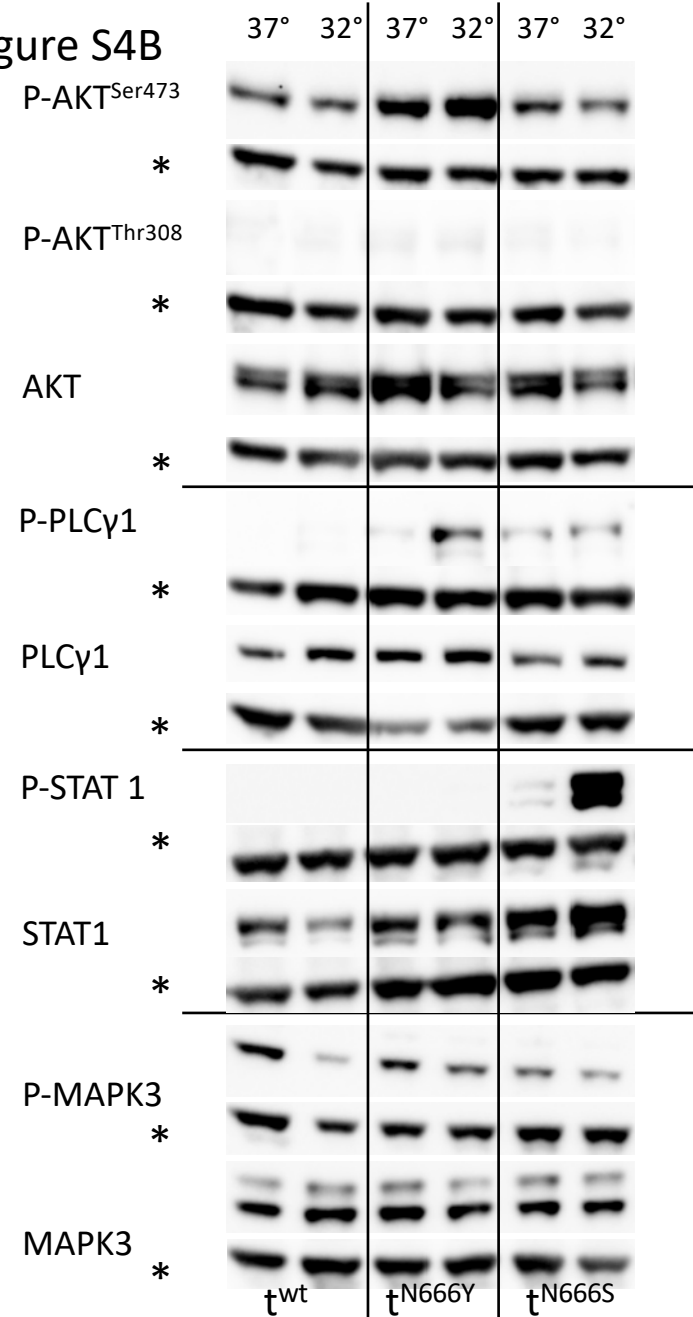

|         |                    |                                      |
|---------|--------------------|--------------------------------------|
| - 60KDa | t <sup>wt</sup>    | transduced with WT vector            |
|         | t <sup>N666Y</sup> | transduced with p.(Asn666Tyr) vector |
| - 60KDa | t <sup>N666S</sup> | transduced with p.(Asn666Ser) vector |
|         | *                  | GAPDH                                |

- 160KDa

- 160KDa

- 90KDa

- 90KDa

- 40KDa

- 40KDa

Transduced HeLa cells harvested in serum (to detect also P-AKT) after overnight exposure to 37° or 32°. Increased levels of P-PLCγ1 and slightly increased P-AKT is seen in N666Y cells at 32°. Greatly increased levels of P-STAT1 is seen in N666S cells.

## Supplemental Table S1

## Variants retained after filtering

| Chr | Start     | End       | Ref | Obs | Gene   | ExonicFunc          | cDNA Change                                 | AChange      |
|-----|-----------|-----------|-----|-----|--------|---------------------|---------------------------------------------|--------------|
| 19  | 55508765  | 55508766  | TG  | -   | NLRP2  | frameshift deletion | NM_001174082:exon11:c.2894_2895del          | p.965_965del |
| 17  | 37900375  | 37900375  | G   | C   | GRB7   | nonsynonymous SNV   | NM_001030002:exon7:c.G716C                  | p.R239P      |
| 5   | 149503840 | 149503840 | T   | A   | PDGFRB | nonsynonymous SNV   | NM_002609:exon14:c.A1996T                   | p.N666Y      |
| 9   | 35813771  | 35813771  | G   | A   | HINT2  | nonsynonymous SNV   | NM_032593:exon2:c.C92T                      | p.A31V       |
| 7   | 107603504 | 107603506 | ACC | GTT | LAMB1  | delins              | NM_002291.2:exon15:c.1701_1703delinsCC<br>A | p.V568H      |

The NLRP2 frameshift deletion was regarded an unlikely candidate as the gene in gnomAD is listed with pLI = 0, with 53 (expected 45) loss of function mutations distributed throughout the gene, i.e this gene will tolerate haploinsufficiency. Likewise, the HINT2 mutation is located in a non-conserved region of the protein and predicted to be tolerated/benign. In gnomAD it is recorded a number of SNV's in the immediate surroundings. In addition, it is postulated that HINT2 will tolerate haploinsufficiency. The GRB7 c.G716C mutation was not inherited by the affected granddaughter and was therefore excluded. The LAMB1 indel will change the moderately conserved amino acid Valine to Histidine. The various prediction software used by Alamut classifies is not in concordance, ranging from *uncertain/possibly damaging* (Align GVGD/PolyPhen-2 humvar) to *Deleterious/Disease Causing* (SIFT/MutationTester). In gnomAD several amino acids in the immediate vicinity is listed, including one affecting the same codon (p.Val568Phe). In addition, LAMB1 is in OMIM coupled to Lissencephaly (#150240) with autosomal recessive inheritance. It is thus unlikely that this mutation could cause this dominant inherited disease.

## Microsatellite analysis of the PDGFRB locus

| Name              | Primer 1                           | Primer 2                          | C        | Ampl<br>h<br>r | Ampli<br>con<br>start | Ampli<br>con<br>end |
|-------------------|------------------------------------|-----------------------------------|----------|----------------|-----------------------|---------------------|
| D5S4              | AGTCACCTTCTCT                      | AGGCCTCATTCAAA                    |          |                | 14836                 | 14836               |
| 13                | GTCTCCA                            | ATCTGT                            | 5        | 272            | 7356                  | 7627                |
| D5S8              | TACCACAGCAAC                       | GAGGAAAGCAAAG                     |          |                | 14900                 | 14900               |
| 12                | CACAAAGA                           | ACCATGA                           | 5        | 162            | 8723                  | 8884                |
| <b><i>PDG</i></b> |                                    |                                   |          | <b>(212</b>    | <b>14949</b>          | <b>14951</b>        |
| <b><i>FRB</i></b> | <b><i>(Start) « ATG..... «</i></b> | <b><i>« .....TAG « (Stop)</i></b> | <b>5</b> | <b>85)</b>     | <b>5326</b>           | <b>6610</b>         |
| D5S2              | TTGGCTAATGGG                       | GCTACCTAAAGAAC                    |          |                | 14957                 | 14957               |
| 015               | AGGCAACA                           | ACAGTCATGGC                       | 5        | 173            | 8337                  | 8509                |
| D5S6              | AAGGCATATGGG                       | CCACACCATTATGA                    |          |                | 14989                 | 14989               |
| 36F               | AAATATCTGT                         | CATTTTCT                          | 5        | 144            | 6516                  | 6659                |
| D5S2              | AGCTACTACCAG                       | CTACATTATTATTAT                   |          |                | 14996                 | 14996               |
| 014               | CAGCATTC                           | TGTGTGTC CG                       | 5        | 160            | 3917                  | 4076                |
